# Supplementary material for: Lanthanide functionalized hybrid materials of polyoxometallate based metal–organic frameworks for multi-color luminescence
Source: Royal Society of Chemistry journal article supplement (doi:10.1039/c7nj02824e), 2017-01-01
Supplement: c7nj02824e1.pdf [file c7nj02824e1.pdf]

## Electronic Supporting Information

### Lanthanide functionalized hybrid materials of polyoxometallate based metal-organic frameworks for multi-color luminescence

G. D. Jia, and B. Yan\*

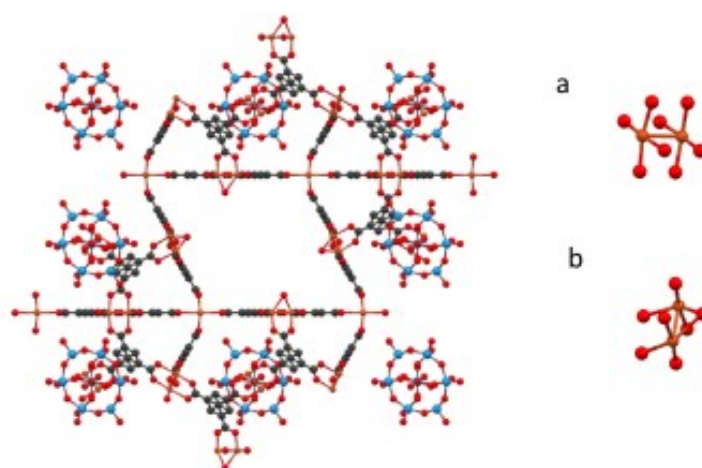

Figure S1 The scheme for the crystal structure COK-15: red for O, blue for W, black for C and orange for Cu, respectively; a, b is the coordination mode of Cu ion.

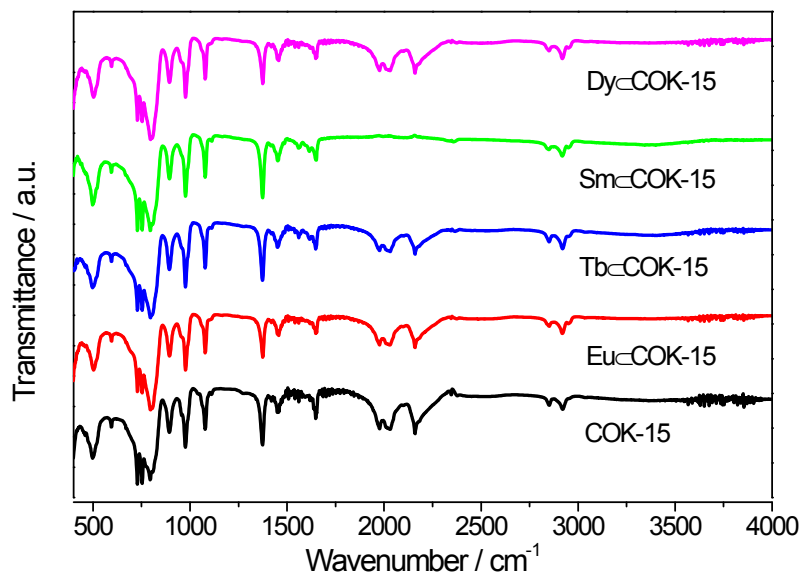

Figure S2 The FTIR spectra of COK-15 and its lanthanide functionalized hybrid materials  $\text{Ln}^{3+}\text{-COK-15}$

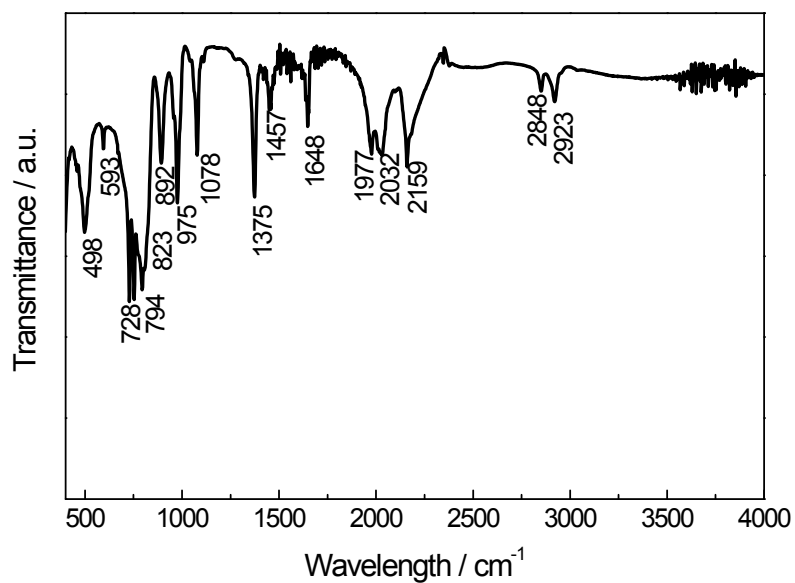

Figure S3 The assignments for the main bands of FTIR spectrum of COK-15

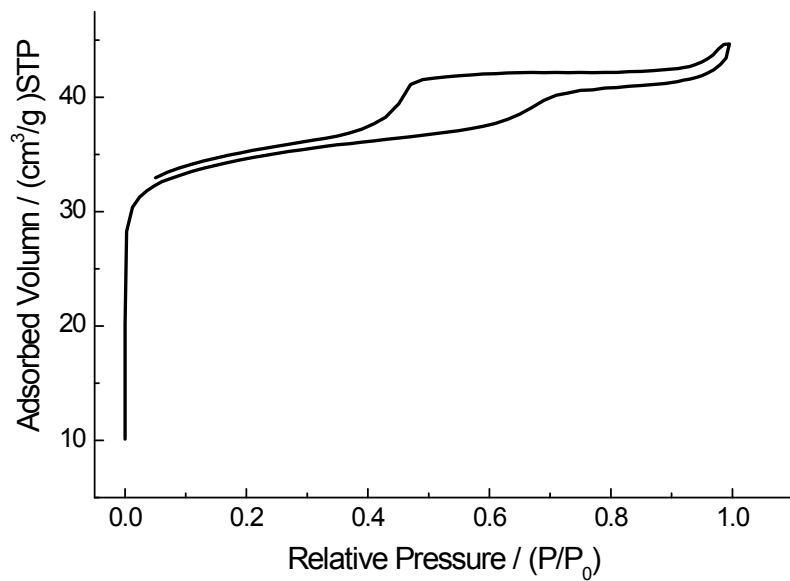

Figure S4 The selected nitrogen adsorption –desorption isotherms of the COK-15.

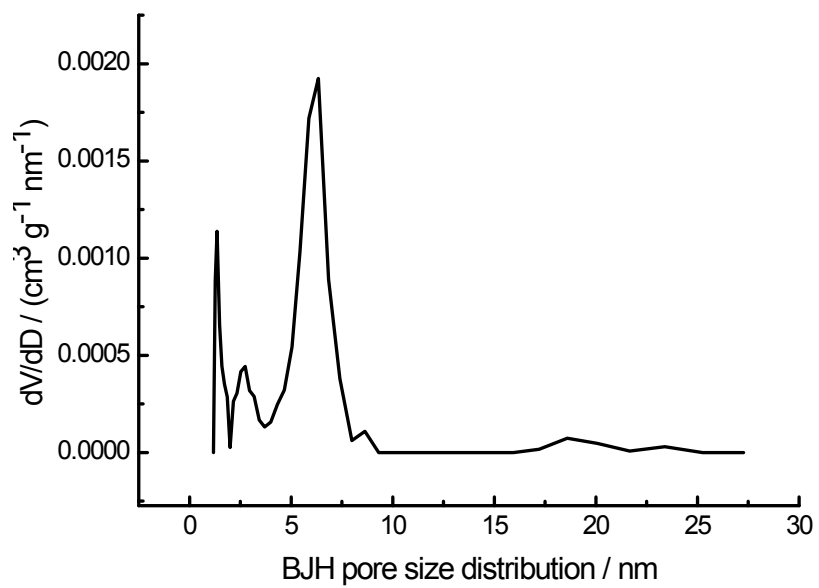

Figure S5 The BJH pore size distribution diagram for COK-15

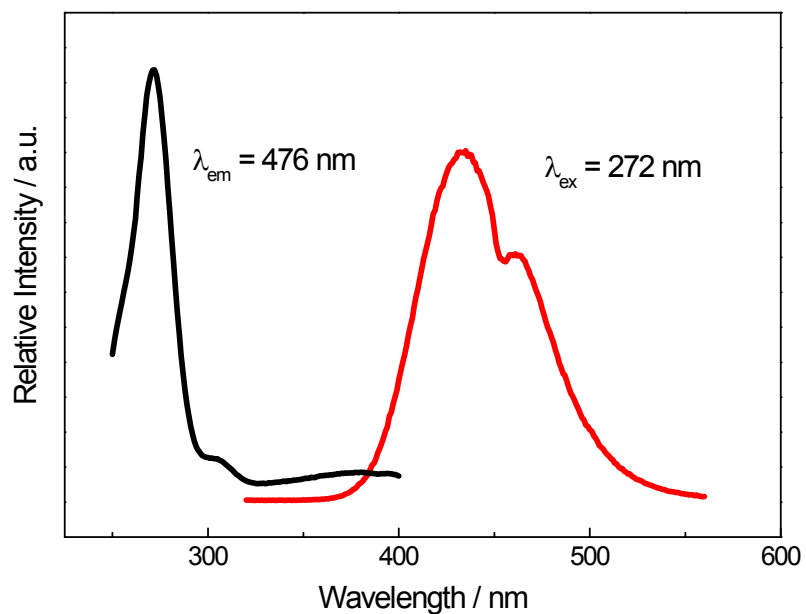

Figure S6 The excitation and emission spectra of COK-15

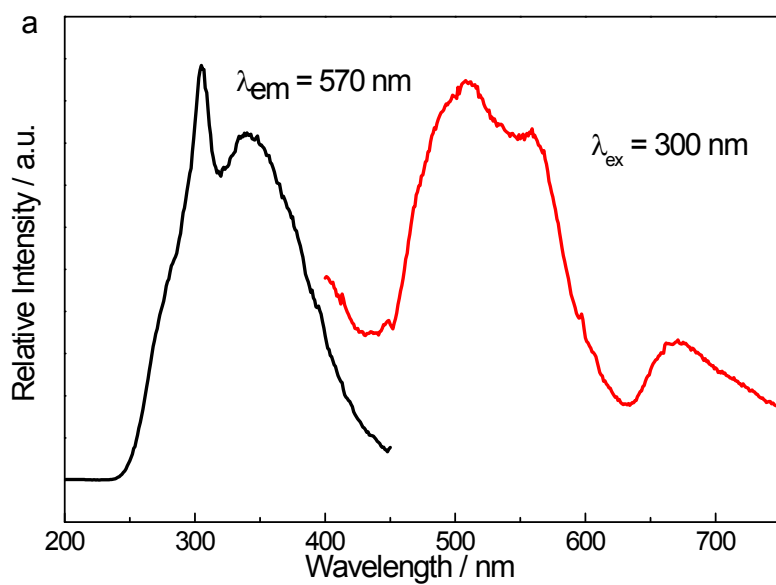

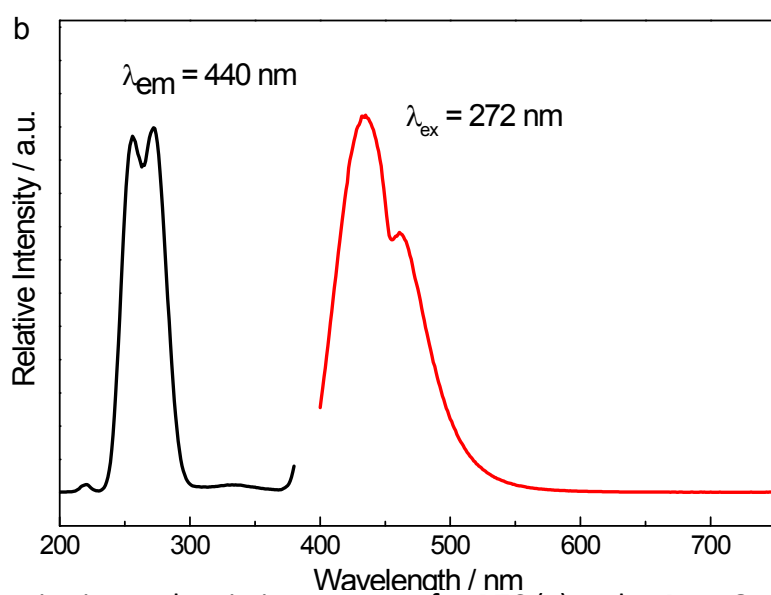

Figure S7 The excitation and emission spectra of  $\text{H}_3\text{BTC}$  (a) and  $\text{H}_3\text{PW}_{12}\text{O}_{40}$  (b)

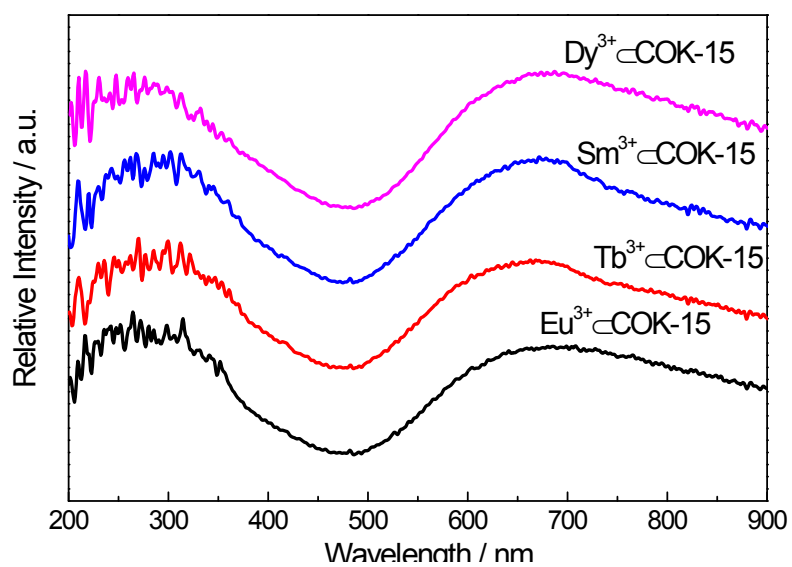

Figure S8 The ultraviolet diffuse reflectance spectra of hybrid materials  $\text{Ln}^{3+}\text{-COK-15}$
